# Supplementary material for: A Characterization of Biological Activities and Bioactive Phenolics from the Non-Volatile Fraction of the Edible and Medicinal Halophyte Sea Fennel (Crithmum maritimum L.)
Source: MDPI journal article supplement (doi:10.3390/foods13091294), 2024-04-23
Supplement: s1 [file s1]

## Supplementary Data

1. NMR spectroscopic data (500 MHz, CDCl<sub>3</sub>) for 3,5-di-*O*-caffeoylquinic acid identified in MeOH<sub>40</sub> fraction of sea fennel extract.  
(d: doublet, dd: doublet of doublets, m: multiplet, brs: broad singlet).

| Compound | 3,5-di- <i>O</i> -caffeoylquinic acid |                       |
|----------|---------------------------------------|-----------------------|
| Position | $\delta_H$ (J in Hz)                  | $\delta_C$ , Type     |
| 1        | -                                     | 74.7, qC              |
| 2        | 2.35/2.13 (m)                         | 36.0, CH <sub>2</sub> |
| 3        | 5.45/5.36 (m)                         | 72.5, CH              |
| 4        | 3.96 (dd, 9.9)                        | 70.5, CH              |
| 5        | 5.36/5.45 (m)                         | 72.1, CH              |
| 6        | 2.13/2.35 (m)                         | 38.6, CH <sub>2</sub> |
| 7        | 7.60 (d, 15.9)                        | 177.3, COOH           |
| 1'/1''   | -                                     | 127.9/127.8, qC       |
| 2'/2''   | 7.06 (brs)                            | 115.1, CH             |
| 3'/3''   | -                                     | 146.8, qC             |
| 4'/4''   | -                                     | 149.6/149.5, qC       |
| 5'/5''   | 6.77 (dd, 1.2)                        | 116.5, CH             |
| 6'/6''   | 6.97/6.96 (dd, 2.0)                   | 123.1/123.0, CH       |
| 7'/7''   | 7.60/7.57 (d, 15.9)                   | 147.3/147.0, CH       |
| 8'/8''   | 6.35/6.26 (d, 15.9)                   | 115.5/115.2, CH       |
| 9'/9''   |                                       | 168.9/168.3, qC       |

2. NMR spectroscopic data (500 MHz, CDCl<sub>3</sub>) for 2 glycosylated quercetines identified in MeOH<sub>60</sub> fraction of sea fennel extract. 1, Quercetin-3-O-rutinoside; 2, Quercetin-3-O-glucoside.  
(d: doublet, dd: doublet of doublets, m: multiplet).

| Compounds |                      | 1                     | 2                                         |
|-----------|----------------------|-----------------------|-------------------------------------------|
| Position  | $\delta_H$ (J in Hz) | $\delta_C$ , Type     | $\delta_H$ (J in Hz)<br>$\delta_C$ , Type |
| 2         | -                    | 159.3, qC             | - 159.3, qC                               |
| 3         | -                    | 135.6, qC             | - 135.2, qC                               |
| 4         | -                    | 179.4, qC             | - 179.4, qC                               |
| 5         | -                    | 162.9, qC             | - 163.1, qC                               |
| 6         | 6.19 (d, 1.9)        | 100.1, CH             | 6.19 (d, 1.9) 100.2, CH                   |
| 7         | -                    | 166.6, qC             | - 167.0, qC                               |
| 8         | 6.38 (d, 1.9)        | 94.9, CH              | 6.38 (d, 1.9) 94.9, CH                    |
| 9         | -                    | 158.6, qC             | - 158.5, qC                               |
| 10        | -                    | 105.5, qC             | - 105.1, qC                               |
| 1'        | -                    | 123.1, qC             | - 123.2, qC                               |
| 2'        | 7.66 (d, 8.6)        | 117.6, CH             | 7.66 (d, 8.6) 117.3, CH                   |
| 3'        | -                    | 145.9, qC             | - 145.0, qC                               |
| 4'        | -                    | 149.9, qC             | - 149.0, qC                               |
| 5'        | 6.86 (d, 8.6)        | 116.1, CH             | 6.86 (d, 8.6) 115.2, CH                   |
| 6'        | 7.62 (dd, 1.9)       | 123.5, CH             | 7.57 (dd, 1.9) 123.1, CH                  |
| 1''       | 5.10 (d, 7.9)        | 104.8, CH             | 5.12 (d, 7.9) 104.4, CH                   |
| 2''       | 3.27 (dd, 9.25)      | 75.7, CH              | 3.47 (dd, 9.25) 75.5, CH                  |
| 3''       | 3.40-3.46 (m)        | 78.2, CH              | 3.39 (m) 77.9, CH                         |
| 4''       | 3.40-3.46 (m)        | 71.4, CH              | 3.42 (m) 71.2, CH                         |
| 5''       | 3.38 (m)             | 77.2, CH              | 3.38 (m) 77.2, CH                         |
| 6''       | 3.71 (m)-3.90 (m)    | 68.6, CH <sub>2</sub> | 3.72 (m)-3.87 (m) 68.6, CH <sub>2</sub>   |
| 1'''      | 4.50 (d, 1.9)        | 102.4, CH             |                                           |
| 2'''      | 3.60 (dd, )          | 72.2, CH              |                                           |
| 3'''      | 3.51 (m)             | 72.1, CH              |                                           |
| 4'''      | 3.25 (m)             | 73.9, CH              |                                           |
| 5'''      | 3.42 (m)             | 69.7, CH              |                                           |
| 6'''      | 1.10 (d, 5.9)        | 17.9, CH              |                                           |
